# Supplementary material
Source: PubMed Central journal article supplement (PMC4078853)
Supplement: 1321072111_pnas.201321072SI.pdf [file 1321072111_pnas.201321072SI.pdf]

# Supporting Information

Cousijn et al. 10.1073/pnas.1321072111

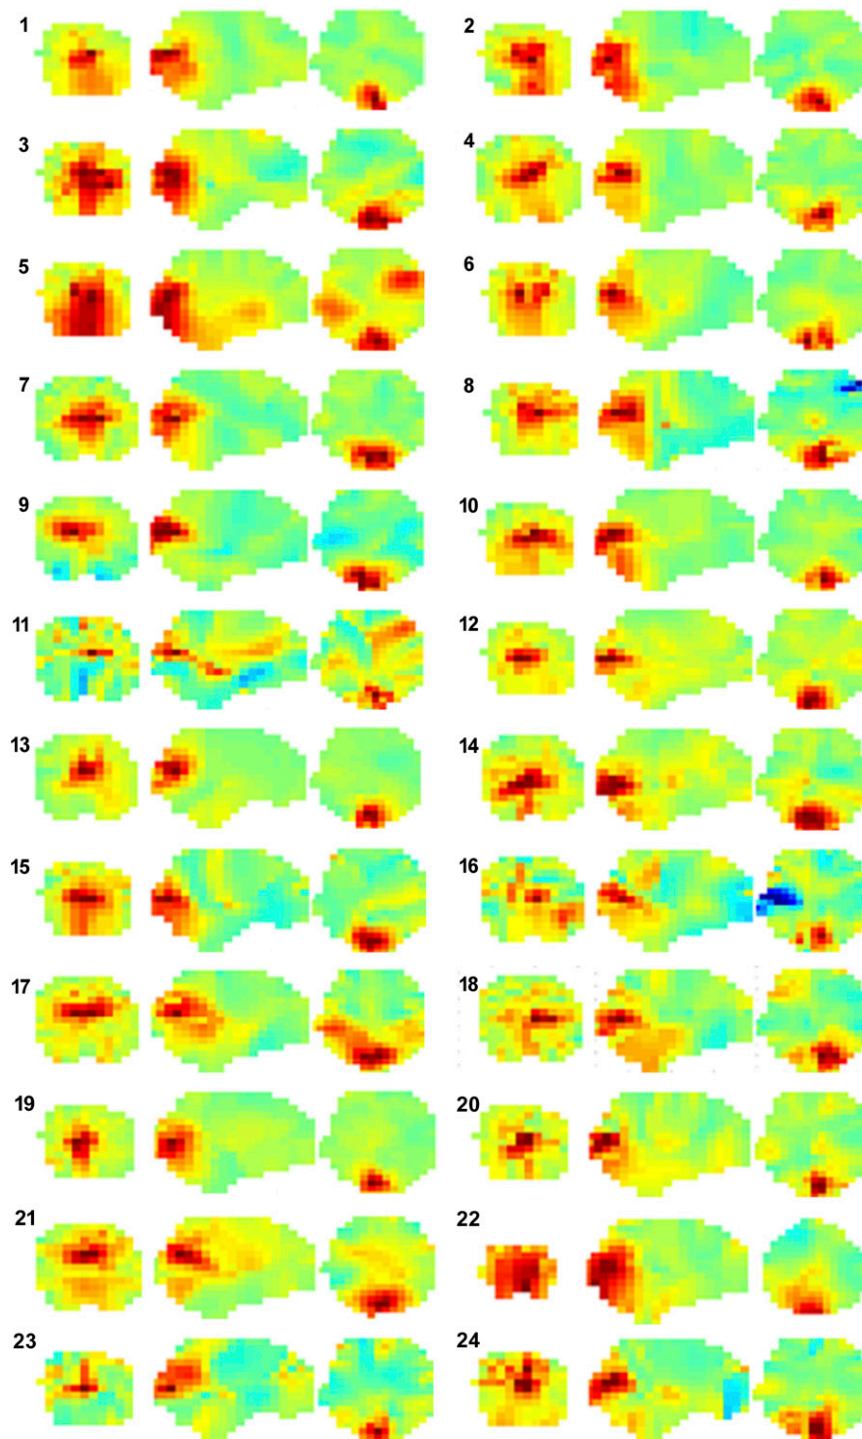

Fig. S1. (Continued)

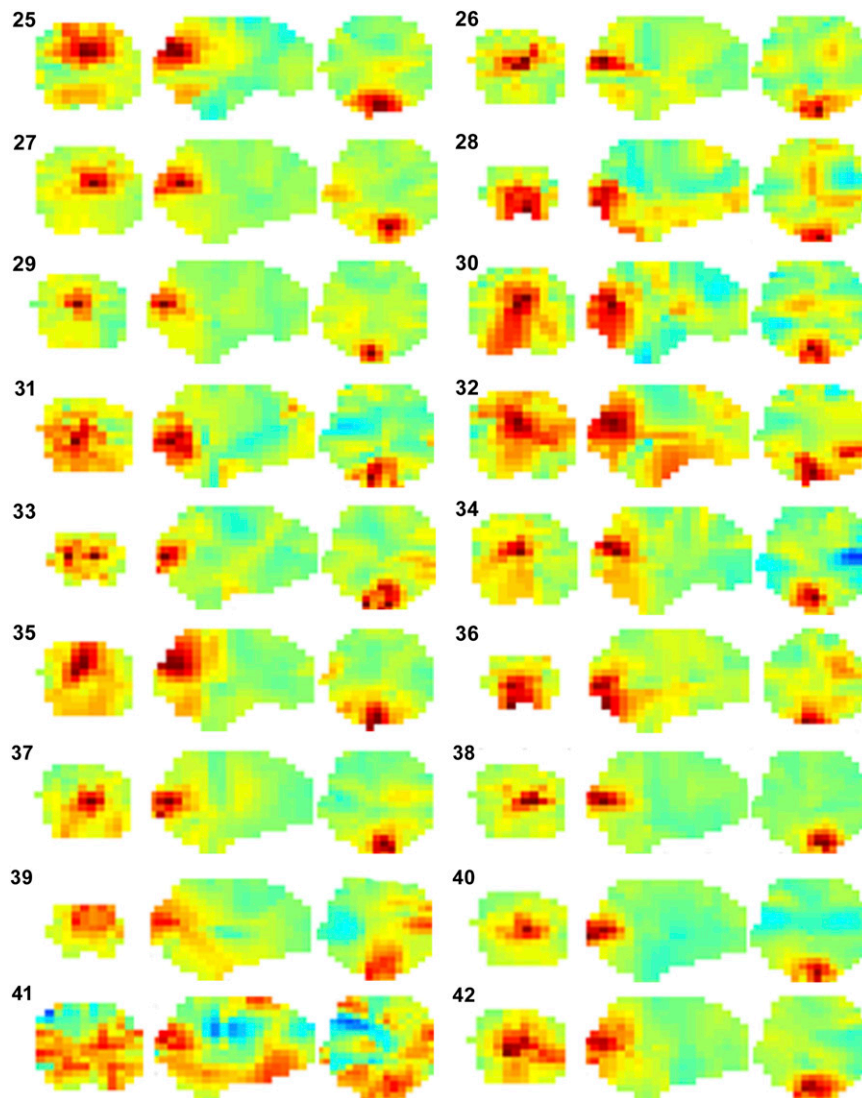

Fig. S1. Coronal, sagittal, and axial slices showing the localization of the gamma peak for all participants included in the final analysis ( $n = 42$ ).
